# Supplementary material for: Glycemic index and microstructure analysis of a newly developed fiber enriched cookie
Source: Royal Society of Chemistry journal article supplement (doi:10.1039/c5fo01137j), 2015-10-21

## **Glycemic index and microstructure analysis of a newly developed fiber enriched cookie**

Jan Philipp Schuchardt, Jasmin Wonik, Ute Bindrich, Michaela Heinemann, Heike Kohrs,  
Inga Schneider, Katharina Möller, Andreas Hahn

### **Supplementary Data**

1 Supplementary Figure (Figure S1)

**Figure S1 Histogram analysis of adhesion forces calculated from representative AFM force maps captured on starch granules of different origin.**

**A)** Whole grain barley flour, **B)** spelt flour, **C)** oat flakes, **D)** soft wheat dust **E)** whole grain wheat flour. nN: nano Newton

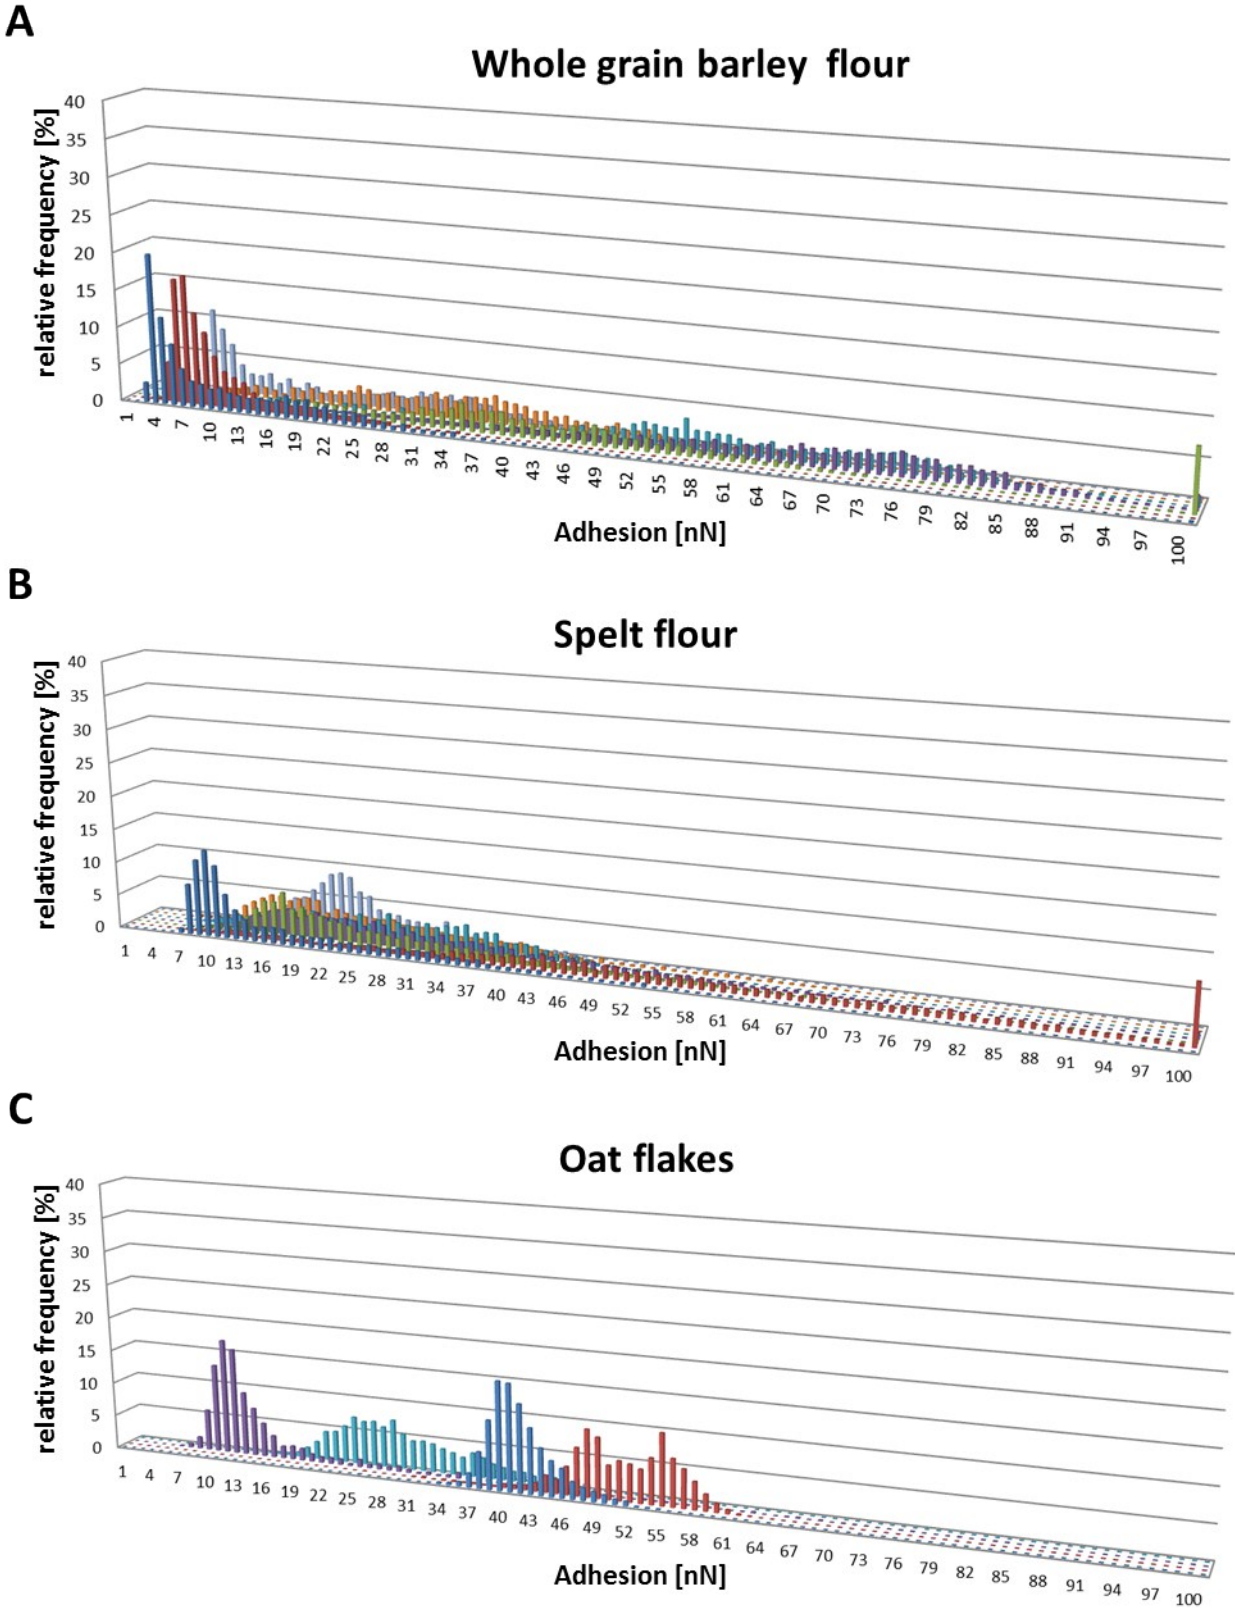

**D**

### Soft wheat dunst

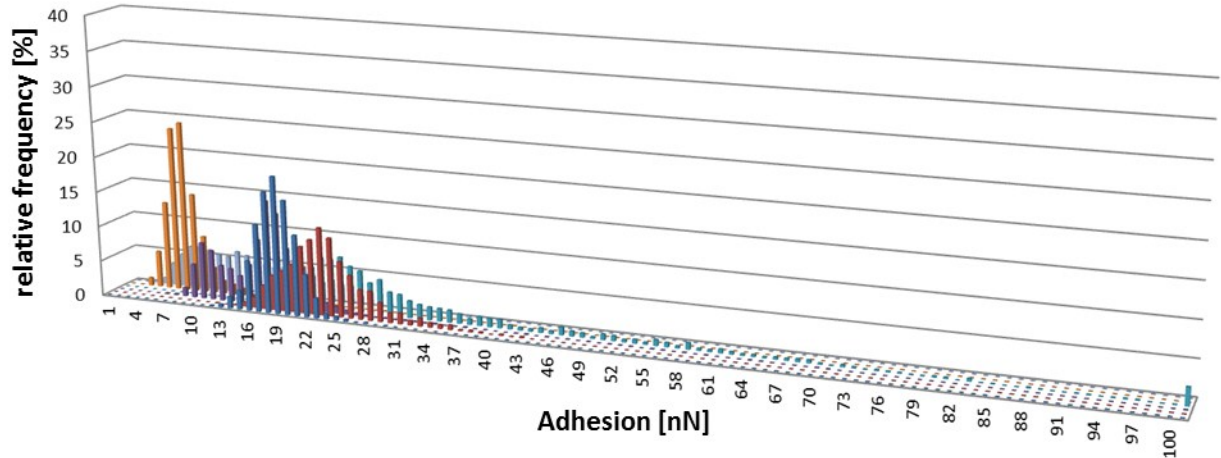

**E**

### Whole grain wheat flour

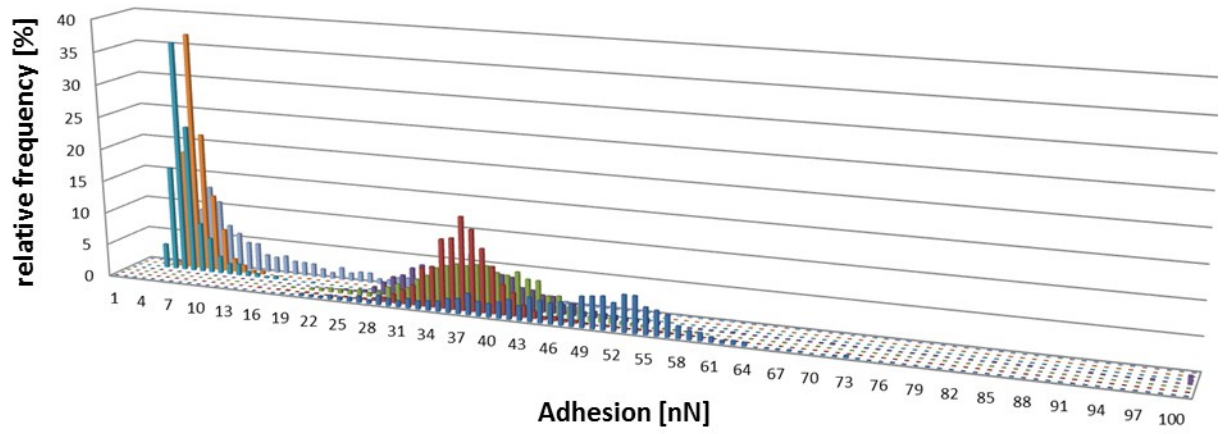

Supplement: c5fo01137j1.pdf [file c5fo01137j1.pdf]
